# Supplementary material for: Dissolution and uniformity of content of tablets developed with extract of Ximenia americana L
Source: PubMed Central journal article supplement (PMC5993115; doi:10.1371/journal.pone.0197323), 2018-05-24
Supplement: pone.0197323.s001.pdf [file pone.0197323.s001.pdf]

EditMyEnglish

## English Editing Certificate

This document certifies that the manuscript listed below was edited for proper English language, grammar, punctuation, and spelling by the expert staff at EditMyEnglish.

### Manuscript Title:

Dissolution and uniformity of content of tablets developed with extract of  
Ximenia americana L.

### Authors:

Cleildo P. Santana, Francinalva D. de Medeiros, Lidiane P. Correia, Paulo  
Henrique G. D. Diniz, Germano Vêras, Ana Cláudia D. Medeiros

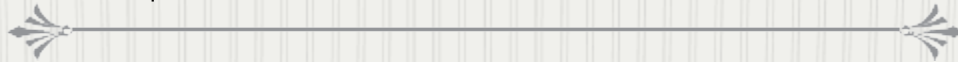

### Certificate Verification Key:

244-476-271-351-604

### Project Number:

84043

This certificate may be verified by emailing [info@editmyenglish.com](mailto:info@editmyenglish.com). Documents receiving this certificate should be prepared for publication. However, please note that the author has the ability to accept or reject our suggestions for changes and can make changes after the editing process is complete, all of which can adversely affect the quality of the text after the editing process.

**Edit**  
**My**  
**English**
