# Supplementary material for: Dissolution and uniformity of content of tablets developed with extract of Ximenia americana L
Source: PubMed Central journal article supplement (PMC5993115; doi:10.1371/journal.pone.0197323), 2018-05-24
Supplement: pone.0197323.s002.pdf [file pone.0197323.s002.pdf]

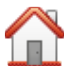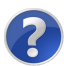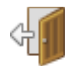

Tempo Restante: 29:42

PÁGINA INICIAL (../PAGINAS/HOME.ASPX) > ATIVIDADE DE ACESSO (../PAGINAS/HOME.ASPX) > CADASTRO DE ATIVIDADE DE ACESSO (../PAGINAS/CADATIVIDADE.ASPX)

MENU

## Cadastro de Atividade de Acesso

Tipo de Usuário:

Independente

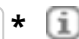

Responsável pelo cadastro

Adicionar +

\*

| CPF         | Habilitado |  |  |
|-------------|------------|--|--|
| 92956467468 | Sim        |  |  |

Objeto do Acesso:

Patrimônio Genético

\*

O acesso foi realizado antes de 17/11/2015 ou  
obteve autorização de acesso antes de  
17/11/2015?

Sim

\*

Tem autorização de acesso?

Não – Sem solicitação em tramitação

\*

Finalidade do Acesso:

Pesquisa

\*

Científica

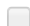

Bioprospeção

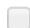

Desenvolvimento

Tecnológico

As atividades objeto deste cadastro são  
baseadas em outras atividades de acesso  
realizadas anteriormente?

Não

\*

Este cadastro está vinculado a cadastro anterior de remessa?

Não \*

## Patrimônio Genético

**Título da Atividade:**

Desenvolvimento de comprimidos com atividade antimicrobiana a partir de extrato de Ximenia americana \*

**Título da Atividade em inglês:**

Development of tablets with antimicrobial activity from extract of Ximenia americana L.

**Resumo da atividade (incluindo objetivos e resultados esperados ou obtidos, conforme o caso)**

O uso de plantas para fins medicinais é uma tradição em diversas culturas, em todo o mundo, desde épocas remotas. Ainda hoje, o conhecimento popular fornece informações sobre propriedades medicinais de inúmeras espécies, efeitos colaterais e adversos, e instruções para seu cultivo e preparo para uso no tratamento de enfermidades. Embora o conhecimento da medicina tradicional não seja mais tão intensamente difundido, a tradição do uso de plantas medicinais persiste na população, que frequentemente faz uso de medicamentos fitoterápicos, tradicionais ou industrializados. Diante do

**Resumo não sigiloso da Atividade em Inglês:**

The use of plants for medicinal purposes is a tradition in many cultures around the world, from ancient times. Even today, the popular knowledge provides information about medicinal properties of many species, side and adverse effects, and instructions for its cultivation and preparation for use in treating diseases. Although knowledge of traditional medicine is not as intensely widespread anymore, the tradition of using medicinal plants persist in the population, which often makes use of herbal

**Palavra(s)-chave:**

Extrato nebulizado, estudo de compatibilidade, Ximenia americana L., comprimido, controle da qualidade,

**Palavra(s)-chave em inglês:**

Nebulized extract, compatibility study, Ximenia americana L., tablet, quality control, chemical marker, phyto

**Período das Atividades:**

**Data  
Início:**

03/2014

**Data  
término:**

02/2016 \*

Ainda não iniciado ou em execução

## Equipe

Adicionar + \*

| Nome Completo                  | Documento   | Instituição                      | Nacionalidade |                                                                                       |
|--------------------------------|-------------|----------------------------------|---------------|---------------------------------------------------------------------------------------|
| Ana Cláudia Dantas de Medeiros | 92956467468 | Universidade Estadual da Paraíba | Brasil        |  |

|                         |             |                                  |        |                                                                                   |
|-------------------------|-------------|----------------------------------|--------|-----------------------------------------------------------------------------------|
| Cleildo Pereira Santana | 06753991492 | Universidade Estadual da paraíba | Brasil |  |
|-------------------------|-------------|----------------------------------|--------|-----------------------------------------------------------------------------------|

## Sobre o Componente do Patrimônio Genético acessado

Adicionar + \*

| Tipo de Componente | Espécie           |                                                                                   |
|--------------------|-------------------|-----------------------------------------------------------------------------------|
| Fauna              | Ximenia americana |  |

## Parceria com instituição Nacional

Adicionar +

## Parceria com instituição sediada no exterior

Adicionar +

## Envio de Amostra que Contenha Patrimônio Genético ao Exterior

Adicionar +

## Resultados Obtidos

Adicionar +

## Retificação de Cadastro

Adicionar +

## Solicitar Atestado de Regularidade

Adicionar +

\* Campos Obrigatórios.

## Termos de uso do SisGen:

Ao realizar este cadastro no SisGen, o usuário reconhece e declara:

I. Ter conhecimento da legislação pertinente, em especial da Lei nº 13.123/2015, e de seus regulamentos;

II. estar ciente do compromisso de não revelar informação reconhecida como sigilosa a que vier ter conhecimento pelo SisGen, sob pena de responsabilização civil, penal e administrativa, conforme disposto na legislação vigente (Arts. 153, 154 e 325 do Código Penal Brasileiro - Decreto-Lei nº 2.848/1940); e

III. ter conferido e ser o detentor dos dados acima informados, respondendo pela sua veracidade, e que os documentos anexados são fac símile dos originais e estarão disponíveis para conferência pelos órgãos competentes, sempre que solicitado, sob pena prevista nos Arts. 299, 307 e 308 do Código Penal Brasileiro(Decreto-Lei nº2.848/1940).

Eu li e concordo com os termos de uso.

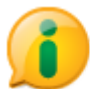

(<http://www.acessoainformacao.gov.br/>)

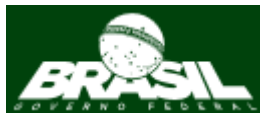

(<http://www.brasil.gov.br/>)

Desenvolvido por Glück Informática (<http://www.gluckinformatica.com.br/>)

^ Voltar para o topo

---
